# Supplementary material for: Sucrose modulates insulin amyloid-like fibril formation: effect on the aggregation mechanism and fibril morphology
Source: Royal Society of Chemistry journal article supplement (doi:10.1039/c6ra25872g), 2017-01-01
Supplement: c6ra25872g1.pdf [file c6ra25872g1.pdf]

## ***Sucrose Modulates Insulin Amyloid-Like Fibril Formation: Effect on The Aggregation Mechanism and Fibril Morphology***

*Carlotta Marasini<sup>a\*</sup>, Vito Foderà<sup>b</sup> & Bente Vestergaard<sup>a\*</sup>*

<sup>a</sup>Department of Drug Design and Pharmacology, University of Copenhagen, Universitetsparken 2, 2100 Copenhagen, Denmark

<sup>b</sup>Section for Biologics, Department of Pharmacy, University of Copenhagen, Universitetsparken 2, 2100 Copenhagen, Denmark

\*To whom correspondence should be addressed:

Carlotta Marasini and Bente Vestergaard

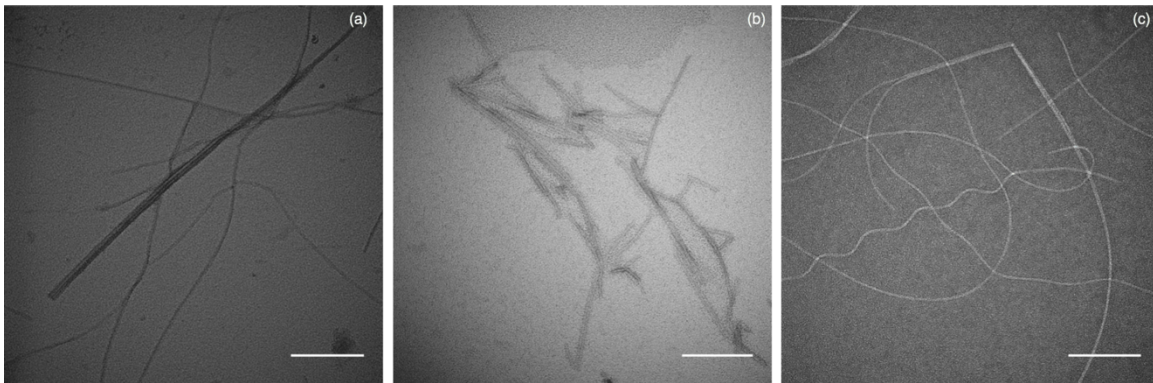

**Figure S 1** TEM (a-c) images of insulin fibrils formed in presence of different amounts of sucrose: (a) 0% (scale bar 200 nm), (b) 20 % (scale bar 200 nm) and (c) 40% (scale bar 200 nm). The fibrils formed at the different amounts of sucrose have different morphologies. Without sucrose, the fibrils have a twisted helical morphology. At 20% sucrose they become straight parallel wires, and finally, at 40% sucrose, the fibrils have a ribbon-like macroscopic structure.

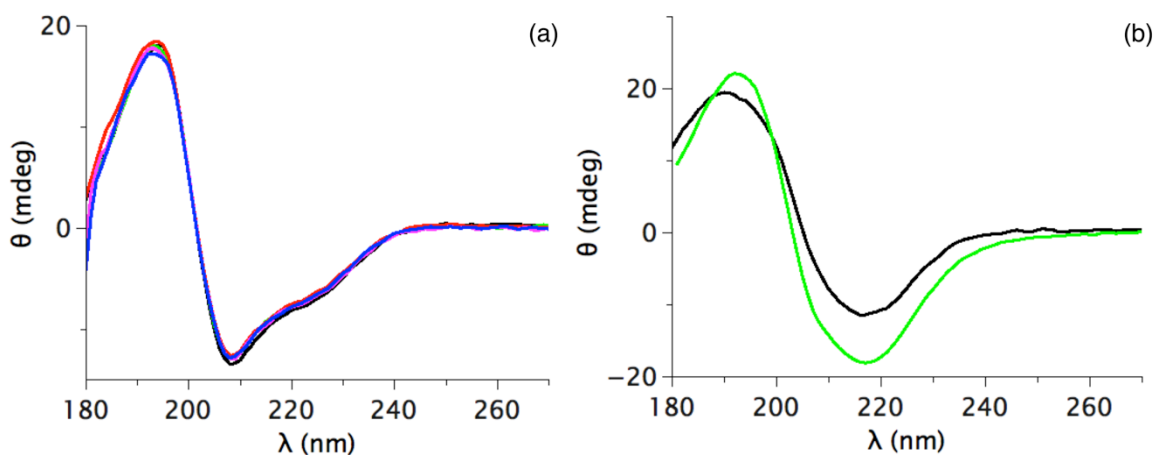

**Figure S 2** SRCD spectra from human insulin at different timepoints of aggregation. (a) Initial monomeric state with different percentages of sucrose: 0% (black), 10% (green), 20% (red), 30% (pink) and 40% (blue). No difference can be detected between the different samples. (b) The final product of the aggregation of human insulin fibrillated with 0% (black) and 10% (green) sucrose. A typical  $\beta$ -sheets signal is recorded.
